# Supplementary material for: A 3D Innovative Approach Supporting the Description of Boring Sponges of the Precious Red Coral Corallium rubrum
Source: MDPI journal article supplement (doi:10.3390/jmse10070868), 2022-06-24
Supplement: s1 [file s1]

**Table S1.** Summary of metrics extracted by micro-CT analysis from the eroded traces of each of the boring sponges found excavating the red coral samples.

| Species                              | Sample | Ø Papillae (mm) |      | Length pap. canals (mm) | Ø Chambers (mm) |      | Length chambers (µm) |       | Length intercam. Canal (mm) |      |
|--------------------------------------|--------|-----------------|------|-------------------------|-----------------|------|----------------------|-------|-----------------------------|------|
|                                      |        | <i>n</i>        | Av.  | Range                   | <i>n</i>        | Av.  | <i>n</i>             | Av.   | <i>n</i>                    | Av.  |
| <i>Alectona millari</i>              | CT3    | -               | -    | -                       | 1               | 5.19 | 1                    | 11.14 | -                           | -    |
|                                      | CTX    | 8               | 0.21 | 0.13 – 1.03             | 3               | 3.90 | 1                    | 2.89  | 1                           | 2.02 |
| <i>Alectona ricardi</i> sp. nov.     | CTX    | 4               | 0.19 | 0.44 – 1.34             | 3               | 3.22 | 3                    | 5.91  | 2                           | 2.93 |
| <i>Thoosa armata</i>                 | CT5    | 4               | 0.13 | 0.57 – 1.58             | 4               | 3.36 | 4                    | 4.26  | 10                          | 1.38 |
|                                      | CT6    | 7               | 0.15 | 0.57 – 1.58             | 6               | 2.24 | 6                    | 2.81  | 10                          | 1.30 |
| <i>Dotona pulchella mediterranea</i> | CT2    | -               | -    | -                       | 5               | 0.80 | 5                    | 1.24  | 10                          | 0.36 |
|                                      | CTX    | -               | -    | -                       | 5               | 1.14 | 5                    | 0.85  | 10                          | 0.37 |
